# Supplementary material
Source: PubMed Central journal article supplement (PMC4046198)
Supplement: Supp_Tables.pdf [file Supp_Tables.pdf]

## Supplementary Data

SUPPLEMENTARY TABLE S1. FORTY-TWO GENES DIFFERENTIALLY EXPRESSED BETWEEN HUMAN T CELL LEUKEMIA VIRUS TYPE 1-ASSOCIATED MYELOPATHY/TROPICAL SPASTIC PARAPARESIS AND ASYMPTOMATIC HUMAN T CELL LEUKEMIA VIRUS TYPE 1 CARRIER IN MICROARRAY ANALYSIS

| <i>Genes</i>        | <i>Probes</i> | <i>Fold change</i> |
|---------------------|---------------|--------------------|
| <i>Ankrd2</i>       | A_24_P188116  | 2.08               |
| <i>Atp5e</i>        | A_32_P123771  | 2.05               |
| <i>C1orf152</i>     | A_23_P350059  | 3.30               |
| <i>C6orf124</i>     | A_32_P334340  | 5.50               |
| <i>Capza2</i>       | A_32_P224666  | 2.09               |
| <i>Cno</i>          | A_23_P69670   | 2.75               |
| <i>Cox5a</i>        | A_32_P98502   | 2.07               |
| <i>Crct1</i>        | A_24_P191047  | 3.24               |
| <i>Cyp4f2</i>       | A_24_P168494  | 2.18               |
| <i>Dgkh</i>         | A_24_P220575  | 2.16               |
| <i>Dicer1</i>       | A_32_P129689  | 2.09               |
| <i>Dirc1</i>        | A_23_P131139  | 5.12               |
| <i>Efcab4a</i>      | A_23_P432545  | 2.39               |
| <i>Gfap</i>         | A_24_P31165   | 4.21               |
| <i>Gpt</i>          | A_23_P146339  | 3.77               |
| <i>Hist1h3i</i>     | A_24_P9321    | 3.45               |
| <i>Hrasls5</i>      | A_23_P416314  | 2.07               |
| <i>Il27</i>         | A_23_P315320  | 5.24               |
| <i>Itm2b</i>        | A_24_P381604  | 2.86               |
| <i>Krtap1-3</i>     | A_24_P142495  | 3.07               |
| <i>Krtap5-8</i>     | A_23_P47086   | 4.39               |
| <i>Lce2d</i>        | A_23_P371284  | 3.31               |
| <i>Leprot</i>       | A_23_P1126    | -2.04              |
| <i>Loc100131138</i> | A_32_P211248  | 3.74               |
| <i>Loc285830</i>    | A_32_P76811   | 2.45               |
| <i>Loc728003</i>    | A_24_P727868  | 2.11               |
| <i>Mab21l2</i>      | A_24_P148907  | 5.05               |
| <i>Mcat</i>         | A_24_P237328  | 5.39               |
| <i>Nacc1</i>        | A_24_P271285  | 2.07               |
| <i>Nap1l1</i>       | A_32_P82409   | 2.00               |
| <i>Ostcl</i>        | A_24_P317450  | 2.19               |
| <i>P2rx7</i>        | A_23_P25354   | -2.01              |
| <i>Pabpc3</i>       | A_23_P48307   | 5.57               |
| <i>Pou3f3</i>       | A_24_P34575   | 2.10               |
| <i>Prss36</i>       | A_24_P412734  | 5.28               |
| <i>Ptges3</i>       | A_32_P114896  | 2.04               |
| <i>Rho</i>          | A_23_P57950   | 2.01               |
| <i>Samd10</i>       | A_23_P427616  | 2.46               |
| <i>Scrt2</i>        | A_24_P117782  | 2.33               |
| <i>Sf3a1</i>        | A_24_P250614  | 2.23               |
| <i>Sp5</i>          | A_32_P74615   | 2.17               |
| <i>Tcp1p3</i>       | A_24_P307184  | 2.19               |

SUPPLEMENTARY TABLE S2. ONE HUNDRED AND THIRTY-FIVE GENES DIFFERENTIALLY EXPRESSED BETWEEN HEALTHY CONTROLS AND HUMAN T CELL LEUKEMIA VIRUS TYPE 1-ASSOCIATED MYELOPATHY/TROPICAL SPASTIC PARAPARESIS IN MICROARRAY ANALYSIS

| <i>Genes</i>         | <i>Probes</i> | <i>Fold change</i> | <i>Genes</i>      | <i>Probes</i> | <i>Fold change</i> |
|----------------------|---------------|--------------------|-------------------|---------------|--------------------|
| <i>Acp5</i>          | A_23_P142075  | 2.05               | <i>Mapkapk3</i>   | A_23_P314584  | 2.37               |
| <i>Adrm1</i>         | A_24_P305597  | 2.01               | <i>Mcm2</i>       | A_32_P103633  | 2.16               |
| <i>Agap3</i>         | A_24_P333364  | -2.59              | <i>Mcm5</i>       | A_23_P132277  | 2.03               |
| <i>Ahmak</i>         | A_23_P21363   | 2.38               | <i>Mea1</i>       | A_23_P30745   | 2.09               |
| <i>Aldh16a1</i>      | A_24_P5743    | 2.11               | <i>Med16</i>      | A_23_P56170   | 2.72               |
| <i>Aldoa</i>         | A_23_P88963   | 2.15               | <i>Mpg</i>        | A_24_P48162   | 2.32               |
| <i>Alox5ap</i>       | A_24_P347378  | 2.25               | <i>Mpnd</i>       | A_23_P130886  | 2.21               |
| <i>Ankhd1</i>        | A_23_P213326  | -2.11              | <i>Myo1g</i>      | A_23_P257542  | 3.13               |
| <i>Ankrd11</i>       | A_32_P82403   | -2.35              | <i>Myppop</i>     | A_24_P392486  | -2.63              |
| <i>Anxa2</i>         | A_23_P146644  | 2.68               | <i>Nbpf11</i>     | A_32_P149492  | -2.15              |
| <i>Bfsp1</i>         | A_23_P109171  | 2.72               | <i>Ncr3</i>       | A_23_P251881  | 2.85               |
| <i>Bloc1s1</i>       | A_23_P53298   | 2.42               | <i>Neurog1</i>    | A_24_P269101  | -2.97              |
| <i>C18orf23</i>      | A_24_P348083  | -2.07              | <i>Nrbp2</i>      | A_23_P112883  | -2.10              |
| <i>C19orf6</i>       | A_23_P90369   | -2.91              | <i>Nthl1</i>      | A_23_P88904   | 2.19               |
| <i>Capns1</i>        | A_23_P67648   | 2.26               | <i>Oasl</i>       | A_23_P139786  | 2.34               |
| <i>Cbx7</i>          | A_32_P203585  | -3.02              | <i>Pafah1b3</i>   | A_23_P16078   | 2.08               |
| <i>Ccdc85b</i>       | A_23_P150249  | 2.13               | <i>Pan3</i>       | A_23_P385938  | -2.03              |
| <i>CD320</i>         | A_23_P119698  | 2.54               | <i>Pcbp4</i>      | A_23_P166807  | 2.27               |
| <i>CD63</i>          | A_23_P139476  | 2.31               | <i>Pcsk5</i>      | A_23_P257003  | -3.13              |
| <i>Cdk2ap2</i>       | A_23_P104579  | 2.18               | <i>Pdcd1</i>      | A_23_P136405  | 2.65               |
| <i>Cdkn2a</i>        | A_23_P43490   | 2.82               | <i>Pdxdc2p</i>    | A_32_P216872  | -2.45              |
| <i>Cks2</i>          | A_23_P71727   | 2.38               | <i>Phf10</i>      | A_23_P503200  | -2.45              |
| <i>Cln3</i>          | A_24_P567408  | -2.26              | <i>Pi16</i>       | A_24_P300379  | 2.64               |
| <i>Clu</i>           | A_23_P215913  | 4.18               | <i>Pip5k1c</i>    | A_23_P78952   | -3.49              |
| <i>Cmip</i>          | A_23_P100263  | -2.97              | <i>Pkm2</i>       | A_32_P147241  | 2.02               |
| <i>Comt</i>          | A_23_P251680  | 2.01               | <i>Poli</i>       | A_23_P306890  | -2.09              |
| <i>Cope</i>          | A_23_P209088  | 2.62               | <i>Prdx5</i>      | A_23_P12989   | 2.17               |
| <i>Cox8a</i>         | A_23_P52639   | 2.04               | <i>Prelid1</i>    | A_23_P79161   | 2.37               |
| <i>Crhr2</i>         | A_24_P926058  | -2.99              | <i>Psmid8</i>     | A_23_P67466   | 2.01               |
| <i>Cst7</i>          | A_23_P68601   | 2.80               | <i>Psors1c2</i>   | A_24_P166434  | -3.58              |
| <i>Cyb5r3</i>        | A_24_P378958  | -2.22              | <i>Rai1</i>       | A_23_P417144  | -2.03              |
| <i>Dctpp1</i>        | A_23_P33613   | 2.24               | <i>Rhbdl1</i>     | A_23_P26468   | -2.84              |
| <i>Ddx17</i>         | A_24_P925611  | -3.15              | <i>Rhoc</i>       | A_23_P12514   | 2.25               |
| <i>Dkfzp434i0714</i> | A_32_P160254  | -4.03              | <i>Ric3</i>       | A_23_P75915   | -2.68              |
| <i>Dnah3</i>         | A_23_P100522  | -6.63              | <i>S100a4</i>     | A_23_P94800   | 2.01               |
| <i>Dtnbp1</i>        | A_24_P145316  | -2.24              | <i>S100p</i>      | A_23_P58266   | 2.42               |
| <i>Eef1a1</i>        | A_32_P44316   | -2.50              | <i>Sbds</i>       | A_32_P177024  | -2.04              |
| <i>Eif6</i>          | A_23_P210939  | 2.03               | <i>Sec31b</i>     | A_23_P35564   | -3.71              |
| <i>Elovl1</i>        | A_23_P23380   | 2.08               | <i>Sell</i>       | A_23_P103522  | -2.14              |
| <i>Fam176b</i>       | A_23_P62831   | 2.11               | <i>Sf3a2</i>      | A_23_P90339   | -2.80              |
| <i>Fbrs11</i>        | A_24_P280497  | -4.15              | <i>Sik1</i>       | A_24_P237231  | -2.08              |
| <i>Fibp</i>          | A_23_P13018   | 2.03               | <i>Sil1</i>       | A_23_P252903  | 2.02               |
| <i>Flot2</i>         | A_23_P55319   | 2.04               | <i>Sit1</i>       | A_23_P43369   | 2.29               |
| <i>Frm4a</i>         | A_24_P43959   | -5.86              | <i>Slc25a1</i>    | A_23_P120776  | 2.07               |
| <i>Gchfr</i>         | A_23_P77328   | 2.14               | <i>Sox8</i>       | A_24_P65292   | -4.01              |
| <i>Giyd1</i>         | A_23_P501451  | 2.38               | <i>Speg</i>       | A_23_P338919  | -2.40              |
| <i>Gsdmd</i>         | A_23_P112103  | 2.54               | <i>Sppl2b</i>     | A_23_P79066   | -2.24              |
| <i>Gstk1</i>         | A_23_P20107   | 2.15               | <i>Spsb2</i>      | A_23_P151098  | 2.10               |
| <i>Hint2</i>         | A_23_P157784  | 2.29               | <i>St6galnac1</i> | A_23_P54968   | 2.01               |
| <i>Hnrnpa0</i>       | A_23_P252449  | -2.23              | <i>Stmn3</i>      | A_23_P165927  | -2.03              |
| <i>Hnrnp11</i>       | A_32_P34149   | -2.18              | <i>Stx16</i>      | A_24_P936122  | -2.32              |
| <i>Hsd17b1</i>       | A_24_P230502  | -2.87              | <i>Synpo</i>      | A_24_P405992  | -3.78              |
| <i>Ier5</i>          | A_24_P379223  | -3.04              | <i>Tr1</i>        | A_23_P10873   | 2.06               |
| <i>Ighm</i>          | A_24_P417352  | 2.83               | <i>Tmem120a</i>   | A_23_P259632  | 2.10               |
| <i>Igk@</i>          | A_32_P39440   | 3.55               | <i>Trim66</i>     | A_32_P396186  | -2.07              |
| <i>Il32</i>          | A_23_P15146   | 2.57               | <i>Tssc4</i>      | A_23_P2026    | 2.18               |
| <i>Ilk</i>           | A_23_P105066  | 2.08               | <i>Ube2s</i>      | A_32_P184933  | 2.64               |
| <i>Irf2bp2</i>       | A_24_P154214  | -2.22              | <i>Ube3a</i>      | A_32_P45375   | -3.58              |
| <i>Irx3</i>          | A_24_P207195  | -3.83              | <i>Ucn2</i>       | A_23_P155453  | -2.66              |
| <i>Jakmip1</i>       | A_23_P144274  | 3.43               | <i>Uqcrc1</i>     | A_23_P132675  | 2.08               |

(continued)

SUPPLEMENTARY TABLE S2. (CONTINUED)

| <i>Genes</i>        | <i>Probes</i> | <i>Fold change</i> | <i>Genes</i>   | <i>Probes</i> | <i>Fold change</i> |
|---------------------|---------------|--------------------|----------------|---------------|--------------------|
| <i>Klhl3</i>        | A_23_P133543  | -2.04              | <i>Vamp5</i>   | A_23_P39840   | 2.25               |
| <i>Lgals1</i>       | A_23_P166459  | 3.98               | <i>Zdhhc24</i> | A_24_P259276  | 2.03               |
| <i>Lmf1</i>         | A_24_P367812  | -3.89              | <i>Zmiz2</i>   | A_24_P29686   | -2.05              |
| <i>Loc100132167</i> | A_32_P74357   | -2.44              | <i>Znf283</i>  | A_24_P409670  | -2.19              |
| <i>Loc339352</i>    | A_24_P542291  | -2.08              | <i>Znf714</i>  | A_24_P19268   | -2.51              |
| <i>Loc439951</i>    | A_24_P203953  | -2.12              | <i>Znf862</i>  | A_24_P333421  | -2.02              |
| <i>Lrp3</i>         | A_23_P16415   | -3.98              | <i>Zscan10</i> | A_23_P15135   | -4.06              |
| <i>Lynx1</i>        | A_23_P257672  | -2.52              |                |               |                    |

SUPPLEMENTARY TABLE S3. ONE HUNDRED AND SIXTEEN GENES DIFFERENTIALLY EXPRESSED BETWEEN HEALTHY CONTROLS AND ASYMPTOMATIC HUMAN T CELL LEUKEMIA VIRUS TYPE 1 CARRIER IN MICROARRAY ANALYSIS

| Genes                | Probes       | Fold change | Genes             | Probes       | Fold change |
|----------------------|--------------|-------------|-------------------|--------------|-------------|
| <i>Acbd7</i>         | A_23_P72584  | 2.64        | <i>Megf6</i>      | A_24_P926960 | -2.32       |
| <i>Afg3l1</i>        | A_23_P404893 | -2.09       | <i>Mgc10814</i>   | A_23_P79032  | -4.01       |
| <i>Aire</i>          | A_23_P68740  | 2.05        | <i>Mgea5</i>      | A_23_P202170 | -2.58       |
| <i>Amy1c</i>         | A_23_P23611  | -3.87       | <i>Mir17hg</i>    | A_32_P139196 | -2.20       |
| <i>Anapc4</i>        | A_23_P317800 | -2.18       | <i>Mlxip</i>      | A_23_P9823   | -2.45       |
| <i>Ankk1</i>         | A_23_P35943  | -4.64       | <i>Mylip</i>      | A_24_P917123 | -5.70       |
| <i>Arf1</i>          | A_24_P566891 | -2.51       | <i>Myo19</i>      | A_23_P320250 | -2.17       |
| <i>Asb16</i>         | A_23_P118581 | 4.62        | <i>Ncrna00116</i> | A_24_P359295 | 2.11        |
| <i>Athl1</i>         | A_23_P98686  | -4.80       | <i>Neat1</i>      | A_24_P566916 | -6.59       |
| <i>Atxn2l</i>        | A_23_P124661 | -2.43       | <i>Nefl</i>       | A_24_P18137  | 2.10        |
| <i>B3galt4</i>       | A_23_P422071 | 2.10        | <i>Nfat5</i>      | A_23_P359647 | -2.36       |
| <i>Bbs5</i>          | A_23_P252642 | -4.55       | <i>Nfkbiz</i>     | A_23_P212089 | -2.78       |
| <i>Bin1</i>          | A_32_P124125 | 2.08        | <i>Pabpc1</i>     | A_32_P152673 | -2.45       |
| <i>Bin2</i>          | A_23_P162386 | -2.25       | <i>Pag1</i>       | A_23_P347070 | -2.29       |
| <i>C1orf63</i>       | A_23_P34396  | -2.54       | <i>Pcyox1l</i>    | A_23_P30275  | -2.08       |
| <i>C21orf96</i>      | A_24_P65941  | -2.96       | <i>Pde4dip</i>    | A_23_P200801 | -2.21       |
| <i>C4orf42</i>       | A_23_P7087   | 2.04        | <i>Plhf2011</i>   | A_23_P216038 | -3.13       |
| <i>C5orf56</i>       | A_24_P829156 | -3.17       | <i>Pilrb</i>      | A_24_P403244 | -2.95       |
| <i>Camk2n2</i>       | A_23_P18406  | 2.54        | <i>Pnn</i>        | A_23_P99582  | -3.87       |
| <i>Capn1</i>         | A_24_P544543 | -2.31       | <i>Polg2</i>      | A_23_P26905  | -2.18       |
| <i>Casp8</i>         | A_23_P209389 | 2.86        | <i>Polr2j2</i>    | A_23_P215669 | 4.57        |
| <i>Ccdc45</i>        | A_23_P307400 | -2.28       | <i>Ppp2r5c</i>    | A_24_P76898  | -4.52       |
| <i>Ccn1l</i>         | A_23_P132454 | -4.38       | <i>Prpf4b</i>     | A_24_P941787 | -2.45       |
| <i>Cellf1</i>        | A_23_P63999  | -3.00       | <i>Pspk</i>       | A_23_P251987 | 3.59        |
| <i>Crebzf</i>        | A_23_P203645 | -2.09       | <i>Qki</i>        | A_24_P456452 | -2.03       |
| <i>Csnk1a1</i>       | A_24_P316154 | -2.48       | <i>R3hdm2</i>     | A_23_P44631  | 5.35        |
| <i>Cyp1a2</i>        | A_23_P206110 | -2.16       | <i>Rbm26</i>      | A_23_P218096 | -2.29       |
| <i>D2hgdh</i>        | A_23_P376627 | -2.33       | <i>Rictor</i>     | A_32_P193322 | -2.24       |
| <i>Dkfpz586i1420</i> | A_23_P403398 | -3.51       | <i>Rnf34</i>      | A_32_P70420  | -3.29       |
| <i>Dkfpz667e0512</i> | A_24_P282377 | -3.76       | <i>Sf3b1</i>      | A_32_P31633  | -2.58       |
| <i>Dmtf1</i>         | A_23_P8664   | -2.54       | <i>Slc27a1</i>    | A_23_P131111 | 4.00        |
| <i>Dync1li2</i>      | A_23_P9688   | -2.93       | <i>Slc35e4</i>    | A_23_P259357 | -4.04       |
| <i>Eno3</i>          | A_23_P130149 | -2.33       | <i>Smchd1</i>     | A_23_P38723  | -2.05       |
| <i>Enosf1</i>        | A_23_P15906  | -2.06       | <i>Son</i>        | A_23_P402733 | -2.32       |
| <i>Epm2aip1</i>      | A_23_P415622 | -2.00       | <i>Spn</i>        | A_23_P433758 | 2.08        |
| <i>Fam46a</i>        | A_23_P70660  | -2.19       | <i>Srsf11</i>     | A_23_P11664  | -3.54       |
| <i>Fam50b</i>        | A_23_P8240   | 2.05        | <i>Srsf2</i>      | A_23_P77776  | -2.44       |
| <i>Flj11710</i>      | A_23_P3921   | -2.13       | <i>Stk4</i>       | A_24_P935026 | -4.49       |
| <i>Foxc2</i>         | A_24_P82358  | 3.96        | <i>Taf1c</i>      | A_23_P163546 | -2.63       |
| <i>Gbp6</i>          | A_23_P130642 | 4.18        | <i>Tardbp</i>     | A_23_P403955 | -2.61       |
| <i>Hectd1</i>        | A_23_P54006  | -2.07       | <i>Tbrg1</i>      | A_24_P931636 | -4.63       |
| <i>Hla-l</i>         | A_24_P110012 | 2.22        | <i>Tcf7</i>       | A_23_P7582   | -2.61       |
| <i>Hmbox1</i>        | A_23_P134684 | -3.35       | <i>Tmc8</i>       | A_23_P152992 | -6.29       |
| <i>Hnrnpa3</i>       | A_24_P706314 | -2.50       | <i>Tnrc6a</i>     | A_23_P349310 | -2.05       |
| <i>Hnrpd1</i>        | A_24_P260300 | -4.69       | <i>Tpm2</i>       | A_23_P216501 | -4.57       |
| <i>Ica1</i>          | A_23_P215419 | 2.71        | <i>Trim33</i>     | A_23_P23526  | -2.04       |
| <i>Ip6k2</i>         | A_23_P301138 | 2.08        | <i>Trim44</i>     | A_23_P139297 | -2.03       |
| <i>Iqsec1</i>        | A_23_P6746   | -2.17       | <i>Trim56</i>     | A_23_P350107 | -2.13       |
| <i>Klc3</i>          | A_23_P4653   | -4.54       | <i>Tsen54</i>     | A_24_P205008 | -2.22       |
| <i>Klf9</i>          | A_23_P415401 | -2.86       | <i>Tuba1c</i>     | A_24_P188071 | 2.01        |
| <i>Lcor</i>          | A_23_P429670 | -2.05       | <i>Txk</i>        | A_23_P302018 | -2.38       |
| <i>Loc100129292</i>  | A_32_P177522 | 2.23        | <i>Usp42</i>      | A_24_P135276 | -2.43       |
| <i>Loc100190939</i>  | A_24_P110914 | -2.15       | <i>Vhl</i>        | A_23_P132611 | -2.05       |
| <i>Loc644189</i>     | A_24_P152649 | 2.06        | <i>Vps13c</i>     | A_24_P927650 | -3.61       |
| <i>Mafa</i>          | A_24_P127719 | 2.23        | <i>Zdhc11</i>     | A_23_P256008 | -3.72       |
| <i>Man2a2</i>        | A_23_P206041 | -2.22       | <i>Znf2</i>       | A_23_P39223  | 3.47        |
| <i>Mbnl1</i>         | A_24_P925361 | -3.31       | <i>Znf573</i>     | A_23_P339079 | -2.67       |
| <i>Med17</i>         | A_24_P941459 | -2.02       | <i>Znf713</i>     | A_23_P74114  | 3.08        |

SUPPLEMENTARY TABLE S4. EIGHTY-FOUR GENES DIFFERENTIALLY EXPRESSED BETWEEN HEALTHY CONTROLS VERSUS ASYMPTOMATIC HUMAN T CELL LEUKEMIA VIRUS TYPE 1 CARRIER AND HUMAN T CELL LEUKEMIA VIRUS TYPE 1-ASSOCIATED MYELOPATHY/TROPICAL SPASTIC PARAPARESIS IN MICROARRAY ANALYSIS

| Genes                | Probes       | Fold change<br>CT vs. HAC | Fold change<br>CT vs. HAM/TSP | Genes            | Probes       | Fold change<br>CT vs. HAC | Fold change<br>CT vs. HAM/TSP |
|----------------------|--------------|---------------------------|-------------------------------|------------------|--------------|---------------------------|-------------------------------|
| <i>Abca5</i>         | A_24_P67096  | -2.36                     | -2.32                         | <i>Loc727820</i> | A_32_P104619 | -7.00                     | -5.74                         |
| <i>Agap1</i>         | A_32_P55161  | -2.43                     | -2.29                         | <i>Lphn1</i>     | A_23_P208551 | -2.22                     | -2.30                         |
| <i>Agap7</i>         | A_32_P221958 | -2.11                     | -3.25                         | <i>Malat1</i>    | A_24_P497244 | -8.29                     | -6.93                         |
| <i>Ahsa2</i>         | A_23_P372467 | -5.88                     | -6.01                         | <i>Mapk8ip3</i>  | A_23_P218215 | -2.77                     | -2.62                         |
| <i>Alpk1</i>         | A_23_P144531 | -5.07                     | -6.78                         | <i>Mst1p9</i>    | A_32_P122373 | -2.06                     | -2.27                         |
| <i>Amt</i>           | A_23_P257164 | -3.01                     | -2.64                         | <i>Myo1c</i>     | A_23_P164022 | -4.18                     | -3.56                         |
| <i>Ankfy1</i>        | A_24_P151834 | -2.97                     | -2.89                         | <i>Nbpf14</i>    | A_23_P359430 | -3.43                     | -2.95                         |
| <i>Ankrd35</i>       | A_23_P325690 | 2.08                      | 2.38                          | <i>Nbpf15</i>    | A_32_P27020  | -2.01                     | -2.36                         |
| <i>Bms1</i>          | A_24_P615822 | -2.49                     | -2.48                         | <i>Nbpf3</i>     | A_23_P308189 | -3.20                     | -2.57                         |
| <i>Ccnl2</i>         | A_23_P217899 | -2.32                     | -2.12                         | <i>Nlrp1</i>     | A_23_P107351 | -2.62                     | -2.92                         |
| <i>Chd2</i>          | A_24_P781846 | -2.83                     | -2.83                         | <i>Notch2nl</i>  | A_32_P75695  | -2.15                     | -2.13                         |
| <i>Chd7</i>          | A_24_P58381  | -2.72                     | -2.47                         | <i>Orai1</i>     | A_23_P150919 | -6.17                     | -6.04                         |
| <i>Cpne5</i>         | A_23_P360804 | 2.75                      | 3.44                          | <i>Orc6l</i>     | A_23_P100341 | -3.22                     | -5.03                         |
| <i>Croccp2</i>       | A_23_P126486 | -2.06                     | -2.61                         | <i>Papd7</i>     | A_23_P18824  | -2.27                     | -2.27                         |
| <i>Ctnnb1</i>        | A_24_P608330 | -2.20                     | -2.09                         | <i>Pde4c</i>     | A_23_P119583 | -4.03                     | -6.23                         |
| <i>Dkfpz434f142</i>  | A_23_P111797 | -2.42                     | -2.41                         | <i>Pde7a</i>     | A_24_P360529 | -3.01                     | -2.76                         |
| <i>Egfl8</i>         | A_23_P424582 | -2.37                     | -2.28                         | <i>Pdzd7</i>     | A_23_P75097  | -5.51                     | -5.23                         |
| <i>Eif5</i>          | A_24_P398810 | -2.19                     | -2.50                         | <i>Pion</i>      | A_23_P416894 | -2.39                     | -2.08                         |
| <i>Engase</i>        | A_23_P152583 | -3.08                     | -2.81                         | <i>Plxdc1</i>    | A_23_P3911   | -4.17                     | -4.38                         |
| <i>Fan1</i>          | A_23_P377888 | -2.40                     | -2.34                         | <i>Pou5f1</i>    | A_23_P59138  | -2.90                     | -2.86                         |
| <i>Flj45340</i>      | A_32_P50406  | -2.50                     | -2.30                         | <i>Prr11</i>     | A_23_P207301 | -3.56                     | -3.82                         |
| <i>Fut6</i>          | A_23_P252664 | -3.00                     | -3.90                         | <i>Pxn</i>       | A_23_P13969  | -5.12                     | -8.17                         |
| <i>Galnt3</i>        | A_23_P209459 | -3.86                     | -5.83                         | <i>Rax2</i>      | A_23_P56150  | -4.64                     | -4.40                         |
| <i>Ggt6</i>          | A_23_P66774  | -4.53                     | -4.21                         | <i>Rbbp6</i>     | A_23_P54781  | -5.00                     | -4.02                         |
| <i>Golga8a</i>       | A_32_P2392   | -2.75                     | -2.81                         | <i>Rpain</i>     | A_24_P307785 | -2.37                     | -2.55                         |
| <i>Golga8f</i>       | A_24_P384588 | -3.77                     | -3.90                         | <i>Sdcbp</i>     | A_23_P168974 | -4.40                     | -3.92                         |
| <i>Hn1</i>           | A_24_P247660 | 2.30                      | 2.04                          | <i>Sfrs18</i>    | A_23_P122615 | -2.16                     | -2.39                         |
| <i>Ikzf1</i>         | A_23_P124934 | -8.05                     | -6.14                         | <i>Snrk</i>      | A_24_P102151 | -2.47                     | -2.34                         |
| <i>Ildr1</i>         | A_23_P109907 | -6.80                     | -10.75                        | <i>Sp100</i>     | A_24_P916816 | -3.35                     | -2.86                         |
| <i>Ivns1abp</i>      | A_32_P205895 | -2.33                     | -2.13                         | <i>Spsb4</i>     | A_23_P258381 | -2.35                     | -3.46                         |
| <i>Jmjd7-pla2g4b</i> | A_23_P403424 | -2.23                     | -2.31                         | <i>Stag3l1</i>   | A_32_P45894  | -2.60                     | -3.05                         |
| <i>Kidins220</i>     | A_24_P7202   | -3.15                     | -2.66                         | <i>Tbc1d3f</i>   | A_23_P164210 | -2.44                     | -2.35                         |
| <i>Lcp1</i>          | A_32_P181443 | 2.14                      | 2.70                          | <i>Tnrc6c</i>    | A_23_P392501 | -3.22                     | -2.54                         |
| <i>Leng8</i>         | A_24_P40055  | -5.14                     | -4.31                         | <i>Tra2a</i>     | A_24_P929807 | -2.28                     | -2.38                         |
| <i>Lime1</i>         | A_23_P376088 | 2.02                      | 2.31                          | <i>Ubox5</i>     | A_23_P218717 | -6.21                     | -9.50                         |
| <i>Loc150759</i>     | A_24_P391591 | -4.65                     | -4.43                         | <i>Usp34</i>     | A_32_P81173  | -5.48                     | -4.32                         |
| <i>Loc221442</i>     | A_24_P303420 | -2.32                     | -2.25                         | <i>Vps13b</i>    | A_24_P280628 | -2.50                     | -2.15                         |
| <i>Loc284889</i>     | A_32_P49334  | 2.42                      | 2.04                          | <i>Zbed5</i>     | A_23_P98483  | -2.49                     | -2.78                         |
| <i>Loc338799</i>     | A_23_P116743 | -4.13                     | -4.16                         | <i>Zbth20</i>    | A_32_P179526 | -8.38                     | -7.78                         |
| <i>Loc390595</i>     | A_24_P481783 | -2.51                     | -2.48                         | <i>Zkscan1</i>   | A_23_P94063  | -4.71                     | -6.50                         |
| <i>Loc441124</i>     | A_24_P456944 | -3.42                     | -4.82                         | <i>Znf688</i>    | A_23_P141044 | 2.14                      | 2.42                          |
| <i>Loc642826</i>     | A_32_P124493 | -2.25                     | -2.08                         | <i>Znf700</i>    | A_23_P27638  | -2.72                     | -2.74                         |

SUPPLEMENTARY TABLE S5. TWENTY-FIVE GENES DIFFERENTIALLY EXPRESSED BETWEEN HEALTHY CONTROL VERSUS HUMAN T CELL LEUKEMIA VIRUS TYPE 1-ASSOCIATED MYELOPATHY/TROPICAL SPASTIC PARAPARESIS AND HUMAN T CELL LEUKEMIA VIRUS TYPE 1-ASSOCIATED MYELOPATHY/TROPICAL SPASTIC PARAPARESIS ASYMPTOMATIC HUMAN T CELL LEUKEMIA VIRUS TYPE 1 CARRIER IN MICROARRAY ANALYSIS

| <i>Genes</i>        | <i>Probes</i> | <i>Fold change CT vs. HAM/TSP</i> | <i>Fold change HAM/TSP vs. HAC</i> |
|---------------------|---------------|-----------------------------------|------------------------------------|
| <i>Bhlhe23</i>      | A_24_P57898   | -2.36                             | 2.11                               |
| <i>Btn2a1</i>       | A_23_P501634  | -2.05                             | 2.16                               |
| <i>Clk3</i>         | A_32_P20691   | -3.98                             | 3.90                               |
| <i>Cox11</i>        | A_24_P391531  | -2.04                             | 2.25                               |
| <i>Fks2</i>         | A_23_P255827  | -2.94                             | 3.42                               |
| <i>Hist1h3b</i>     | A_24_P174924  | -2.44                             | 2.66                               |
| <i>Hist1h3e</i>     | A_23_P70445   | -2.15                             | 2.57                               |
| <i>Hnrnpa1</i>      | A_24_P517901  | -3.32                             | 3.91                               |
| <i>Hnrnpa1l2</i>    | A_24_P32849   | -3.63                             | 3.31                               |
| <i>Loc100130890</i> | A_24_P456884  | -2.73                             | 5.20                               |
| <i>Loc100131582</i> | A_24_P848662  | -3.82                             | 2.79                               |
| <i>Loc400061</i>    | A_24_P92973   | -2.59                             | 3.02                               |
| <i>Loc730144</i>    | A_24_P391960  | -2.24                             | 2.04                               |
| <i>Morf4</i>        | A_24_P3461    | -2.47                             | 2.94                               |
| <i>Nacap1</i>       | A_23_P59888   | -2.93                             | 4.71                               |
| <i>Ppial4a</i>      | A_24_P144499  | -2.16                             | 3.12                               |
| <i>Rsrc2</i>        | A_24_P350160  | -2.39                             | 2.07                               |
| <i>Set</i>          | A_24_P917866  | -2.57                             | 4.75                               |
| <i>Srp14p1</i>      | A_24_P255314  | -2.40                             | 3.48                               |
| <i>Srp9</i>         | A_32_P165340  | -2.63                             | 3.65                               |
| <i>St13p2</i>       | A_24_P24912   | -2.85                             | 2.59                               |
| <i>Sumo1p3</i>      | A_32_P223189  | -2.15                             | 2.02                               |
| <i>Sumo2</i>        | A_32_P228869  | -3.43                             | 4.70                               |
| <i>Trim35</i>       | A_24_P12651   | -3.76                             | 2.35                               |
| <i>Xpo6</i>         | A_23_P206822  | -3.90                             | 3.94                               |

SUPPLEMENTARY TABLE S6. ONE GENE DIFFERENTIALLY EXPRESSED BETWEEN HEALTHY CONTROLS VERSUS ASYMPTOMATIC HUMAN T CELL LEUKEMIA VIRUS TYPE 1 CARRIER AND HUMAN T CELL LEUKEMIA VIRUS TYPE 1-ASSOCIATED MYELOPATHY/TROPICAL SPASTIC PARAPARESIS VERSUS ASYMPTOMATIC HUMAN T CELL LEUKEMIA VIRUS TYPE 1 CARRIER IN MICROARRAY ANALYSIS

| <i>Genes</i>  | <i>Probes</i> | <i>Fold change CT vs. HAC</i> | <i>Fold change HAM/TSP vs. HAC</i> |
|---------------|---------------|-------------------------------|------------------------------------|
| <i>Tmeff2</i> | A_24_P239364  | 3.43                          | 2.41                               |
